# Supplementary material for: Validation of the Korean version of the thyroid cancer-specific quality of life questionnaire
Source: PubMed Central journal article supplement — Ann Surg Treat Res. 2015 Nov 27;89(6):287–94. doi: 10.4174/astr.2015.89.6.287 (PMC4672091; doi:10.4174/astr.2015.89.6.287), 2015-11-27
Supplement: astr-89-287-s001.pdf [file astr-89-287-s001.pdf]

**Supplementary material.** The Korean version of the THYCA-QoL questionnaire (갑상선암)

연구 일련 번호 : \_\_\_\_\_ 피험자 성명 : \_\_\_\_\_ 설문일 (yy/dd/mm) : \_\_\_\_\_

이 증상들이나 문제들을 어느 정도 경험했는지 각 문항의 해당사항에 표시해 주시기 바랍니다.

|                                        | 전혀<br>아니다 | 약간<br>그렇다 | 꽤<br>그렇다 | 매우<br>그렇다 |
|----------------------------------------|-----------|-----------|----------|-----------|
| <b>* 지난 1 주 동안에</b>                    |           |           |          |           |
| 1. 입안이 마른 느낌을 가진 적이 있습니까?              | 1         | 2         | 3        | 4         |
| 2. 삼키는데 곤란한 적이 있습니까?                   | 1         | 2         | 3        | 4         |
| 3. 목이 쉰 적이 있습니까?                       | 1         | 2         | 3        | 4         |
| 4. 목소리가 잘 안 나온 적이 있습니까?                | 1         | 2         | 3        | 4         |
| 5. 목 안에 뭔가 걸린 듯한 느낌을 받은 적이 있습니까?       | 1         | 2         | 3        | 4         |
| 6. 목에 수술 흉터가 있어 불편한 적이 있습니까?           | 1         | 2         | 3        | 4         |
| 7. 오한을 느낀 적이 있습니까?                     | 1         | 2         | 3        | 4         |
| 8. 더위를 견디기 힘든 적이 있습니까?                 | 1         | 2         | 3        | 4         |
| 9. 얼굴이 화끈 달아 오른 적이 있습니까?               | 1         | 2         | 3        | 4         |
| 10. 근육이나 관절의 통증을 느낀 적이 있습니까?           | 1         | 2         | 3        | 4         |
| 11. 손이나 발이 저린 적이 있습니까?                 | 1         | 2         | 3        | 4         |
| 12. 다리에 쥐가 난 적이 있습니까?                  | 1         | 2         | 3        | 4         |
| 13. 몸이 처진 듯한 느낌을 받은 적이 있습니까?           | 1         | 2         | 3        | 4         |
| 14. 체중이 늘었습니까?                         | 1         | 2         | 3        | 4         |
| 15. 눈이 아프거나, 이물감이 느껴지거나, 건조한 느낌이 있습니까? | 1         | 2         | 3        | 4         |
| 16. 피부가 가렵거나, 건조하다는 등의 문제가 있는 적이 있습니까? | 1         | 2         | 3        | 4         |
| 17. 가슴 두근거림으로 힘든 적이 있습니까?              | 1         | 2         | 3        | 4         |
| 18. 머리가 아픈 적이 있습니까?                    | 1         | 2         | 3        | 4         |
| 19. 갑작스런 피로를 느낀 적이 있습니까?               | 1         | 2         | 3        | 4         |
| 20. 생각하는 것이 어려운 적이 있습니까?               | 1         | 2         | 3        | 4         |
| 21. 집중이 잘 안된 적이 있습니까?                  | 1         | 2         | 3        | 4         |
| 22. 초조함 또는 불안함을 느낀 적이 있습니까?            | 1         | 2         | 3        | 4         |
| 23. 걱정애 시달린 적이 있습니까?                   | 1         | 2         | 3        | 4         |
| <b>* 지난 4 주 동안에</b>                    |           |           |          |           |
| 24. 성생활에 대해 어느 정도의 흥미가 있습니까?           | 1         | 2         | 3        | 4         |
